# Supplementary material for: Transcriptional Analysis of Fracture Healing and the Induction of Embryonic Stem Cell–Related Genes
Source: PubMed Central journal article supplement (PMC2673045; doi:10.1371/journal.pone.0005393), 2009-05-05

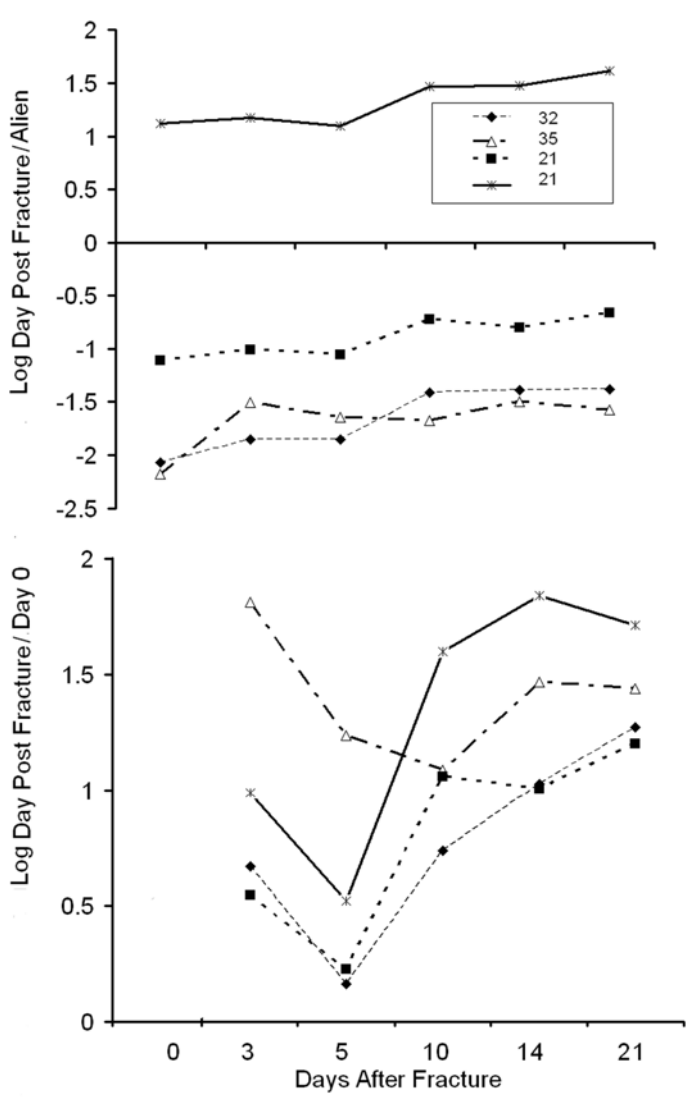

Supplement: pone.0005393.s001.pdf [file pone.0005393.s001.pdf]
